# Supplementary material
Source: publisher figshare collection journal article supplement (https://rs.figshare.com/ndownloader/files/31066254)
Supplement: Supplementary file 1 [file 31066254]

## Sheet: README
This is the supplementary information for the review article Zheng et al., Creating underwater vision through wavy whiskers: A review of the flow sensing mechanisms and biomimetic potential of seal whiskers, 2021, Journal of the Royal Society Interface
The dataset, presented in the form of an Excel spreadsheet, is comprised of three sheets:
1. Whisker behavior in flow (a summary of work, both numerical and experimental, done to study the behavior of seal whiskers or whisker-like structures in flow). This sheet is an expanded version of Table 2 from the above review article.
2. Whisker geometry measurements (a summary of morphometrics conducted on undulating seal whiskers). This sheet is an expanded version of Table 3 from the above review article.
3. Whisker material properties (a summary of Young's modulus and density measurements in the literature). This sheet is an expanded version of Table 4 from the above review article.
An up-to-date version of these datasets is maintained as a GitHub repository: https://github.com/ZhengXingwen/Flow-sensing-mechanisms-and-biomimetic-potential-of-seal-whiskers.git
Please contact a.m.kamat@rug.nl if you feel more information should be added to the above dataset.

## Sheet: Whisker behavior in flow
Reference	doi	Seal species	Whisker scale	Test length	Nature of study	Reynolds number	Methodology	Main results
Hanke et al., 2010	10.1242/jeb.043216	Harbor seal and California sea lion	To scale	Straight section	Experimental and numerical	186 - 535	Head-mounted video recordings, force measurement at the base of excised whiskers using piezoelectric transducer, micro-PIV, CFD simulations to study the effect of undulations on VIV.	Undulations reduced the primary vortex separation region, displaced the first vortices further downstream, and made the pressure field more symmetric about the whisker (Fig. 4a), resulting in a reduction VIV by a factor of 6×.
Miersch et al., 2011	10.1098/rstb.2011.0155	Harbor seal and California sea lion	To scale	Straight section	Experimental	187 - 535 (estimated)	Piezoelectric transducer to measure forces during interaction of isolated harbor seal and sea lion whiskers with upstream vortex generator.	Harbor seal whisker displayed much higher SNR with respect to sea lion whisker due to 10× reduction in VIV, indicating superior wake detection.
Murphy et al., 2013	10.1371/journal.pone.0069872	Harbor seal, northern elephant seal, and California sea lion	To scale	Full whisker	Experimental	560 (estimated)	Laser Doppler vibrometry (LDV) to measure velocity of midpoint of harbor seal and sea lion whiskers.	Similar VIV response for both whiskers, i.e., no effect of undulations. Angle of attack (AOA) had a more significant effect on VIV (VIV increased with increasing AOA).
Beem and Triantafyllou, 2015	10.1017/jfm.2015.513	Harbor seal	Scaled-up (20x)	Straight section	Experimental	1590 - 11130	Dye visualization, vibration measurements using strain gauges conducted at the base of a 3D printed whisker-like structure in free flow and in a wake generated by upstream vortex generator.	The whisker-like structure recorded a lower VIV response for all the tested flow speeds. In the presence of an upstream vortex generator, the whisker was locked-in to the dominant wake frequency using a 'slaloming' mechanism.
Wang and Liu, 2016	10.1007/s00348-016-2117-9	Harbor seal	Scaled up (~ 15x)	Straight section	Experimental	1800	Time-resolved PIV behind circular, elliptical, wavy, and whisker-shaped cylinders.	Reduced recirculation zone behind the whisker-shaped structure and stable reversed flow region compared to circular, elliptical, and wavy cylinder. Reduced velocity fluctuations indicating suppresed vortex shedding.
Morrison et al., 2016	10.1016/j.jocs.2016.04.004	Harbor seal	To scale	Straight section	Numerical	500	Lattice-Boltzmann method to simulate VIV response of circular, elliptical, and seal whisker in steady flow and in the presence of a hydrodynamic disturbance caused by flapping paddle.	Seal whisker displayed lower drag and lift forces compared to circular cylinder and lower lift forces compared to elliptical cylinder. Oscillating paddle affected the drag and lift coefficients of whisker and increased kinetic energy in the wake compared to the circular cylinder.
Wang and Liu, 2017	10.1016/j.ijheatfluidflow.2017.09.006	Harbor seal	Scaled up (~ 15x)	Straight section	Experimental	1800	Wind tunnel experiments conducted at different angles of attack (AOA) with time-resolved PIV measurements.	VIV response of whisker-like structure is low within AOA < 30 deg after which it becomes unstable.
Bunjevac et al., 2018	10.1007/s12650-018-0484-4	Elephant seal	To scale	Full whisker	Experimental	110 and 390	Snapshot and time-resolved PIV for elephant seal and sea lion whiskers (full length).	Undulations promoted better mixing within the wake and reduced the turbulence intensity and reversed flow region compared to the smoother whisker.
Chen et al., 2018	10.1016/j.expthermflusci.2018.07.033	Harbor seal	Scaled-up (~ 70x)	Straight section	Experimental	50000	Wind tunnel experiments on whisker-inspired structures, pressure transducers to measure surface pressure distribution, force balance to measure aerodynamic forces, PIV.	Whisker-like structure with wavelength equal to two minor axes found to suppress drag by 15% and fluctuating lift by 58%. Undulating structure disrupted the span-wise correlation of flow.
Kim and Yoon, 2018	10.1016/j.ijheatmasstransfer.2018.05.083	Harbor seal	Not specified	Straight section	Numerical	50 - 500	Numerical solution (finite volume method) of Navier-Stokes equations to study the effect of fluid flow and heat transfer with increasing Reynolds number.	The critical Re for the onset of unsteady flow is higher for whisker-inspired structure than for circular cylinder. Distorted vortex rollers (as opposed to Karma street) are formed in the whisker-inspired structure's wake in the Re = 300-500 range.
Liu et al., 2019	10.1088/1748-3190/ab34fe	Harbor seal	To scale	Straight section	Numerical	150 - 500	CFD simulations to study the effect of phase difference (between major and minor axis undulations) on VIV response.	The 180 deg phase difference in the seal whisker geometry is essential for the formation of hairpin vortices that ensure low lift and drag forces over a wide range of flow parameters.
Muthuramalingam and Bruecker, 2019	10.1038/s41598-019-49243-5	California sea lion	To scale	Full whisker	Experimental	225	Optical fibers to mimic sea lion whiskers mounted on 3D printed sea lion muzzle, study of whisker interaction with vortices using tip displacement and PIV measurements.	The whisker-like structures demonstrated a jerky 'stick-slip' response to oncoming vortices that could represent a potential method of decoding vortex street information.
Lyons et al., 2020	10.1371/journal.pone.0241142	Harbor seal	To scale	Straight section	Numerical	500	Large eddy simulations (LES) to study the effect of geometric parameters on resulting lift and drag forces using a 2-factor design of experiments approach.	Variations in aspect ratio, undulation wavelength, streamwise and transverse amplitude of undulations have the most significant effect on drag and lift forces on the whisker-like structure.

## Sheet: Whisker geometry measurements
Reference	doi	Seal species	Peak to peak top	Peak to peak bottom	Crest width	Trough width	Crest width/Trough width
Hanke et al., 2010	10.1038/s41598-019-49243-5	Harbor seal	1.82	N/A	1.19	0.95	1.25
Ginter et al., 2012	10.1371/journal.pone.0034481	Harbor seal	3.27 ± 0.39	3.26 ± 0.40	0.92 ± 0.13	0.73 ± 0.12	1.26
Murphy et al., 2013	10.1371/journal.pone.0069872	Harbor seal	3.88 ± 0.45	N/A	1.11 ± 0.88	0.88 ± 0.03	1.27
Rinehart et al., 2017	10.1088/1748-3190/aa8885	Harbor seal	3.44 ± 0.72	3.45 ± 0.73	1.05 ± 0.24	0.83 ± 0.19	1.26
Ginter et al., 2012	10.1371/journal.pone.0034481	Harp seal	3.97 ± 0.70	3.94 ± 0.69	0.88 ± 0.14	0.69 ± 0.13	1.28
Ginter et al., 2012	10.1371/journal.pone.0034481	Ringed seal	3.56 ± 0.73	3.53 ± 0.82	0.70 ± 0.21	0.49 ± 0.21	1.44
Ginter et al., 2012	10.1371/journal.pone.0034481	Spotted seal	4.01 ± 0.63	3.99 ± 0.63	1.04 ± 0.15	0.85 ± 0.15	1.22
Ginter et al., 2012	10.1371/journal.pone.0034481	Gray seal	3.43 ± 0.38	3.41 ± 0.39	0.76 ± 0.13	0.63 ± 0.11	1.21
Rinehart et al., 2017	10.1088/1748-3190/aa8885	Elephant seal	3.862 ± 0.864	3.862 ± 0.865	1.198 ± 0.372	1.12 ± 0.448	1.06
Ginter et al., 2010	10.1111/j.1748-7692.2009.00365.x	Hooded seal	2.50 ± 0.48	2.50 ± 0.48	0.57 ± 0.09	0.42 ± 0.07	1.35

## Sheet: Whisker material properties
Reference	doi	Seal species	Young's modulus (GPa)	Density (kg/m3)	Methodology (Modulus measurement)
Shatz and de Groot, 2013	10.1371/journal.pone.0054876	Harp seal	1.8 - 3.3	911 ± 100	Tensile test (Instron 8845 Microtester)
Hans et al., 2014	10.1088/1748-3182/9/3/036013	Harbor seal	2 - 5.5 (distal - proximal)	N/A	DMA (0.001% strain at frequencies of 1–150 Hz)
Ginter Summarell et al., 2015	10.1371/journal.pone.0127941	Harp seal	7.62 - 25.27	N/A	Point load bending test (MTS Insight 5 SL uniaxial tester, 25 N load cell)
Ginter Summarell et al., 2015	10.1371/journal.pone.0127941	Harbor seal	7.53 - 22.87	N/A	Point load bending test (MTS Insight 5 SL uniaxial tester, 25 N load cell)
